# Supplementary material for: The Liver X Receptor Is Upregulated in Monocyte-Derived Macrophages and Modulates Inflammatory Cytokines Based on LXRα Polymorphism
Source: Hindawi journal article supplement (doi:10.1155/2019/6217548), 2019-02-28
Supplement: f1 [file 6217548.f1.pdf]

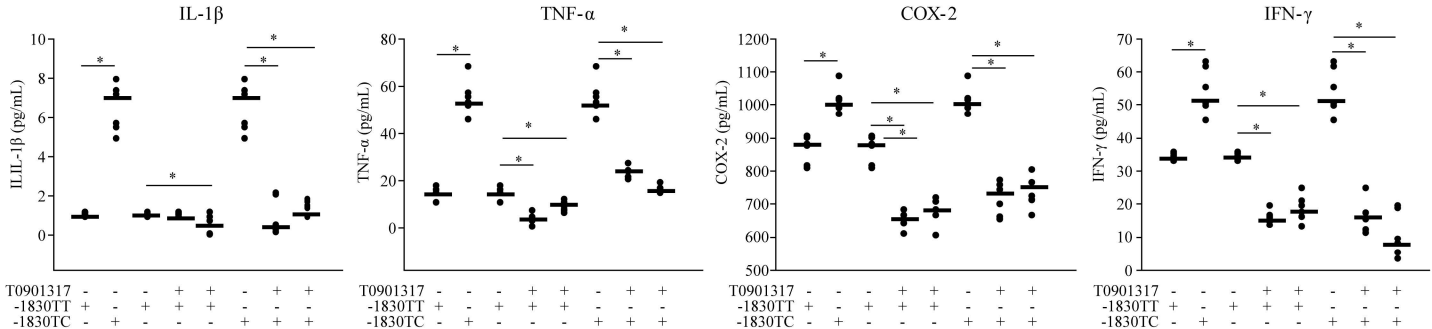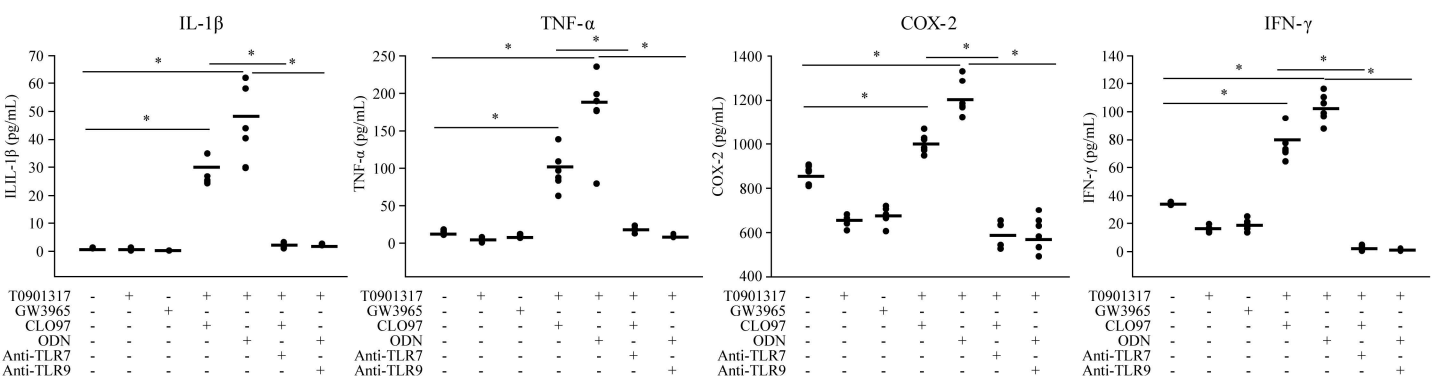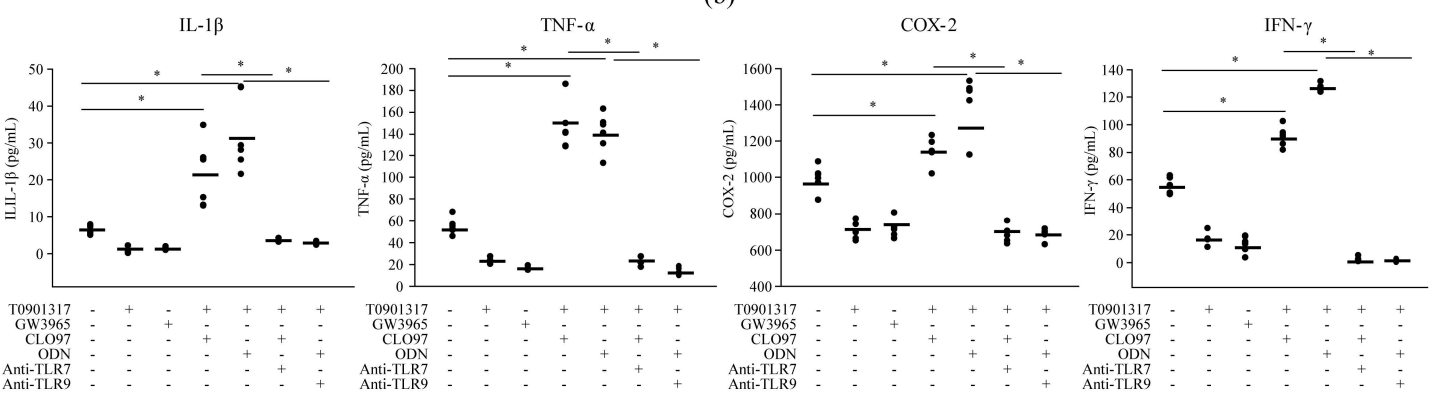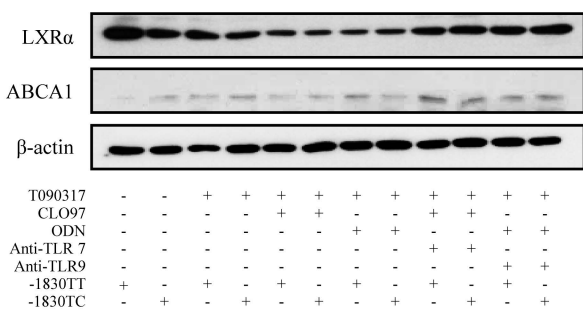

(d)

Supplementary Table 1. Clinical characteristics of SLE patients (n=12)

| Patient                            | TT   |      |      |      |      |      | TC   |      |      |      |      |      |
|------------------------------------|------|------|------|------|------|------|------|------|------|------|------|------|
|                                    | 1    | 2    | 3    | 4    | 5    | 6    | 1    | 2    | 3    | 4    | 5    | 6    |
| Age                                | 23   | 24   | 40   | 19   | 48   | 48   | 48   | 49   | 56   | 44   | 27   | 35   |
| Gender                             | F    | F    | F    | F    | F    | F    | F    | F    | F    | F    | F    | F    |
| <b>Clinical features</b>           |      |      |      |      |      |      |      |      |      |      |      |      |
| Fever                              | -    | -    | -    | -    | -    | -    | -    | -    | -    | -    | -    | -    |
| Oral ulcer                         | +    | +    | +    | +    | -    | -    | +    | +    | +    | +    | -    | +    |
| Arthritis                          | -    | +    | -    | -    | +    | +    | +    | -    | +    | -    | +    | -    |
| Rash                               | +    | +    | -    | +    | -    | -    | -    | -    | -    | +    | +    | -    |
| Serositis                          | -    | -    | -    | -    | -    | -    | -    | -    | -    | -    | -    | -    |
| Nephritis                          | +    | +    | +    | -    | -    | -    | -    | -    | -    | -    | -    | +    |
| <b>Laboratory findings</b>         |      |      |      |      |      |      |      |      |      |      |      |      |
| Leukocytes (x 10 <sup>3</sup> /μL) | 7.1  | 2.2  | 4.2  | 3.9  | 6.7  | 6.5  | 4.2  | 3.5  | 6.6  | 3.0  | 4.8  | 5.8  |
| Hemoglobin (g/dL)                  | 11.3 | 10.7 | 12.7 | 14.7 | 12.8 | 12.2 | 12.7 | 13.3 | 13.4 | 11.5 | 12.5 | 12.8 |
| Platelets (x 10 <sup>3</sup> /μL)  | 288  | 283  | 212  | 169  | 224  | 256  | 182  | 267  | 217  | 79   | 175  | 208  |
| Anti-dsDNA antibody (IU/mL)        | 103  | 103  | 22.6 | 3    | 3    | 10   | 6.2  | 4.6  | 3    | 8.3  | 11.3 | 92.3 |
| Complement 3, mg/dL                | 52   | 35   | 99   | 91   | 72   | 58   | 91   | 104  | 103  | 46   | 82   | 79   |
| Complement 4, mg/dL                | 4    | 3    | 28   | 22   | 23   | 22   | 31   | 29   | 28   | 5    | 13   | 13   |
| ESR (mm/hr)                        | 20   | 29   | 33   | 4    | 2    | 18   | 43   | 28   | 22   | 6    | 19   | 6    |
| CRP (mg/dL)                        | 0.02 | 0.32 | 0.08 | 0.03 | 0.03 | 0.08 | 0.42 | 0.14 | 0.19 | 0.02 | 0.02 | 0.09 |

|                    |      |    |    |      |   |      |     |      |   |     |    |   |   |
|--------------------|------|----|----|------|---|------|-----|------|---|-----|----|---|---|
| SLEDAI             |      | 14 | 13 | 8    | 4 | 6    | 8   | 6    | 2 | 6   | 10 | 8 | 6 |
| <b>Medication</b>  |      |    |    |      |   |      |     |      |   |     |    |   |   |
| Hydroxychloroquine |      | +  | +  | -    | + | +    | +   | +    | + | +   | -  | - | - |
| Azathioprine       |      | -  | +  | -    | - | -    | -   | -    | + | -   | -  | + | - |
| MMF                |      | +  | -  | -    | - | -    | -   | -    | - | -   | -  | - | + |
| Prednisolone       | dose | 20 | 5  | 1.25 | 0 | 1.25 | 2.5 | 1.25 | 0 | 2.5 | 5  | 5 | 5 |
| (mg/day)           |      |    |    |      |   |      |     |      |   |     |    |   |   |

---

SLE, systemic lupus erythematosus; ESR, erythrocyte sedimentation rate; CRP, C-reactive protein;

SLEDAI, systemic lupus erythematosus disease activity index; MMF, mycophenolate mofetil.
